# Supplementary material for: Biodegradable poly(ε-caprolactone)-g-poly(2-hydroxyethyl methacrylate) graft copolymer micelles as superior nano-carriers for “smart” doxorubicin release
Source: Royal Society of Chemistry journal article supplement (doi:10.1039/c2jm30700f), 2012-01-01
Supplement: c2jm30700f.pdf [file c2jm30700f.pdf]

Supplementary Information for

**Biodegradable Poly( $\epsilon$ -caprolactone)-*g*-Poly(2-hydroxyethyl methacrylate) Graft Copolymer Micelles as Superior Nano-Carriers for “Smart” Doxorubicin Release**

Ru Cheng,<sup>a</sup> Xiaoyan Wang,<sup>a</sup> Wei Chen,<sup>a</sup> Fenghua Meng,<sup>a</sup> Chao Deng,<sup>a</sup> Haiyan Liu,<sup>b</sup>  
and Zhiyuan Zhong<sup>\*,a</sup>

Biomedical Polymers Laboratory, and Jiangsu Key Laboratory of Advanced Functional Polymer Design and Application, College of Chemistry, Chemical Engineering and Materials Science, Soochow University, Suzhou, 215123, P. R. China.

<sup>b</sup>Laboratory of Cellular and Molecular Tumor Immunology, Institute of Biology and Medical Sciences, Soochow University, Suzhou 215123, P. R. China.

\* Corresponding author. Tel/Fax: +86-512-65880098, Email: [zyzhong@suda.edu.cn](mailto:zyzhong@suda.edu.cn)

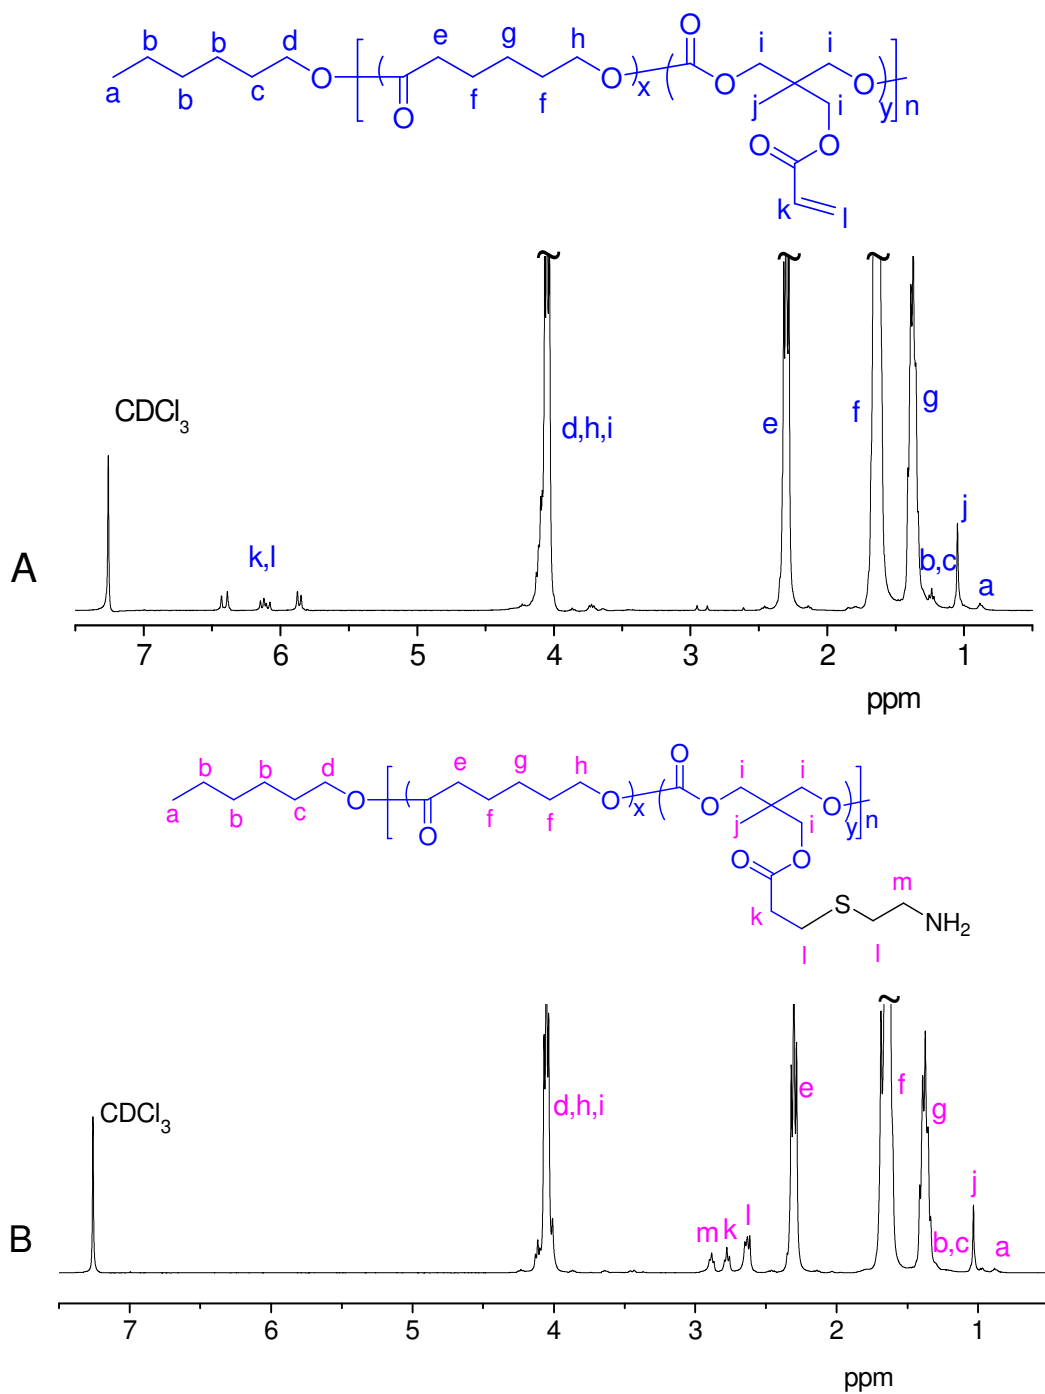

**Figure S1.** <sup>1</sup>H NMR spectra (400 MHz, CDCl<sub>3</sub>) of PCL(Acr) (A) and PCL(Cys) (B).

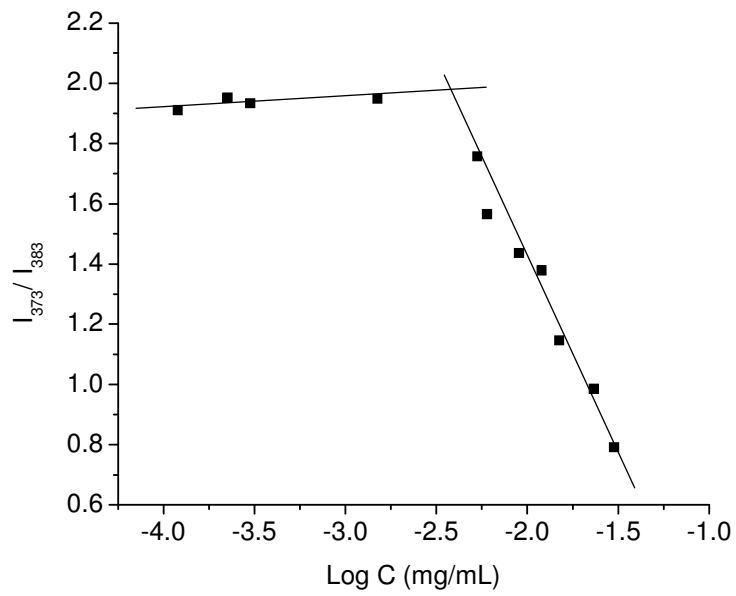

**Figure S2.** Intensity ratio  $I_{373}/I_{383}$  of pyrene at varying PCL-g-PHEMA(16.3k) concentrations in water (pyrene final concentration is 0.6  $\mu\text{M}$ ).
